# Supplementary material for: An Anisotropic Hydrogel by Programmable Ionic Crosslinking for Sequential Two-Stage Actuation under Single Stimulus
Source: MDPI journal article supplement (doi:10.3390/gels9040279), 2023-03-29
Supplement: s1 [file s1]

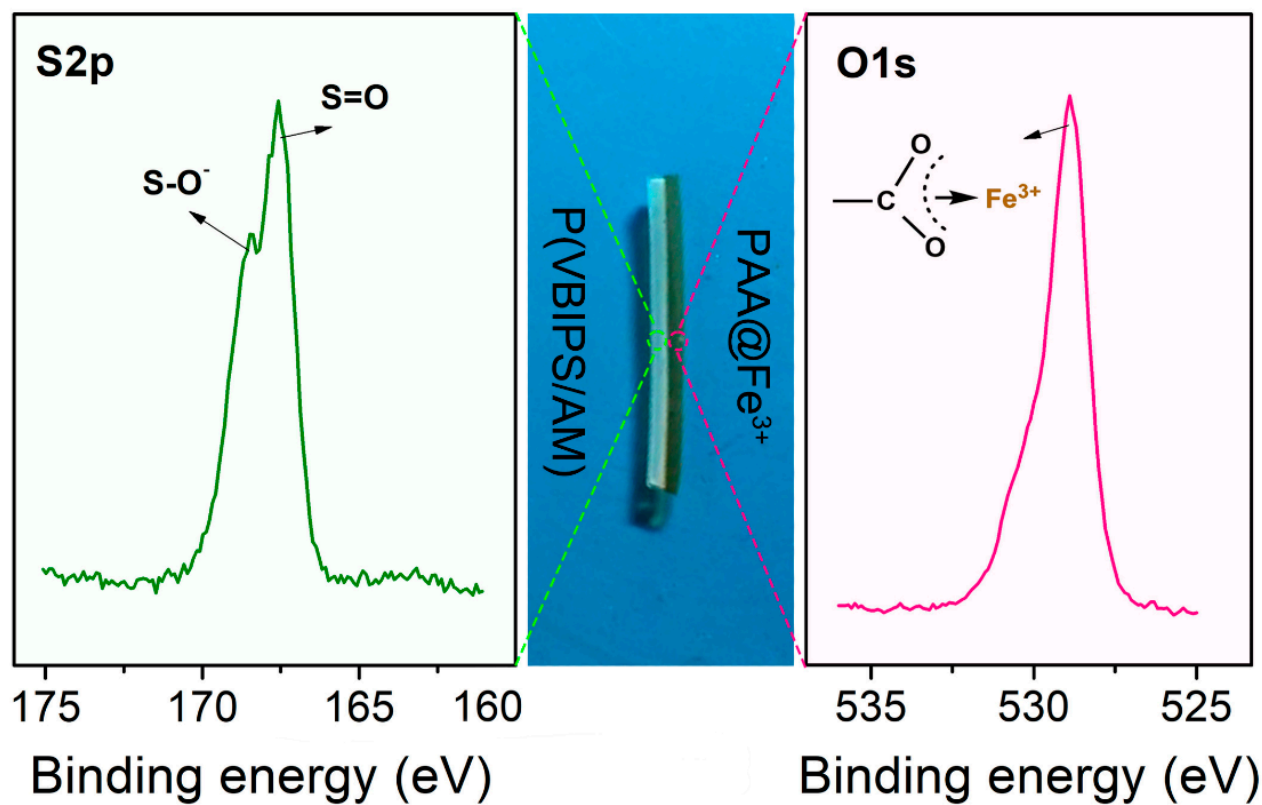

**Figure S1.** High-resolution XPS spectra of PZ-PAA@Fe<sup>3+</sup> bilayer hydrogel.

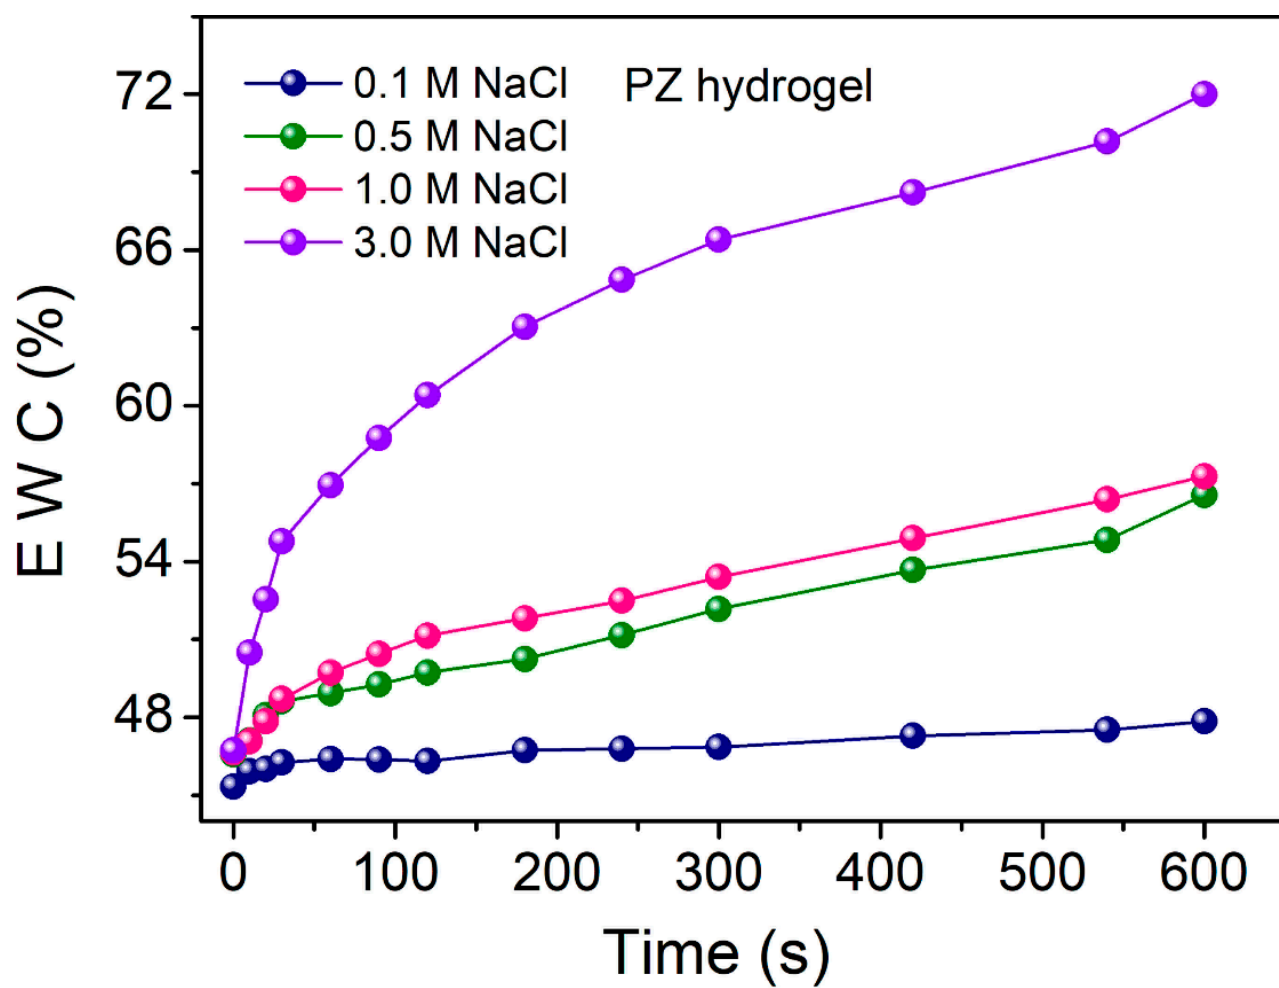

Figure S2. Equilibrium water contents of PZ hydrogel in response to NaCl concentrations.

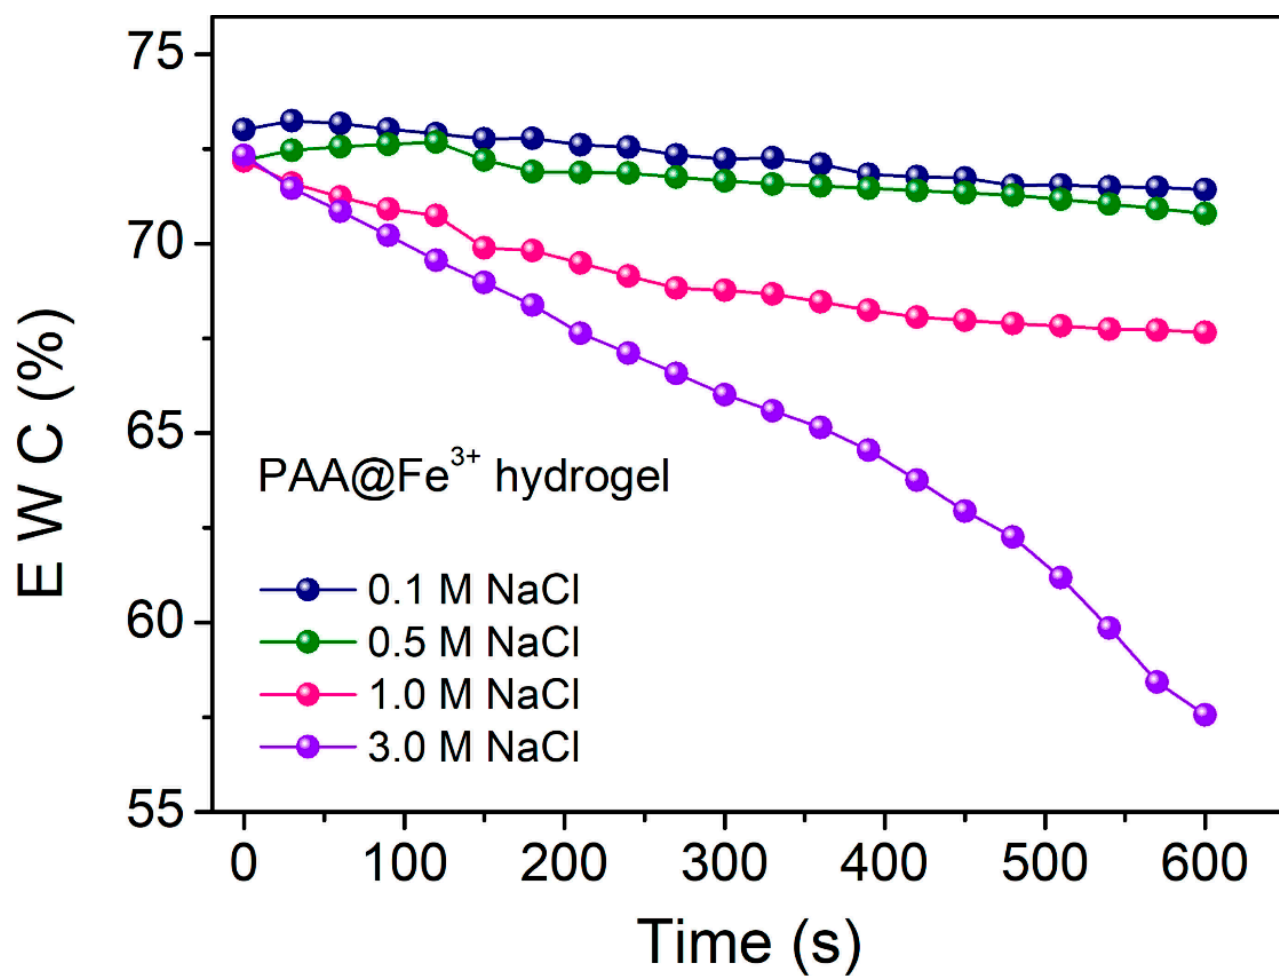

**Figure S3.** Equilibrium water contents of PAA@Fe<sup>3+</sup> hydrogel in response to NaCl concentrations.

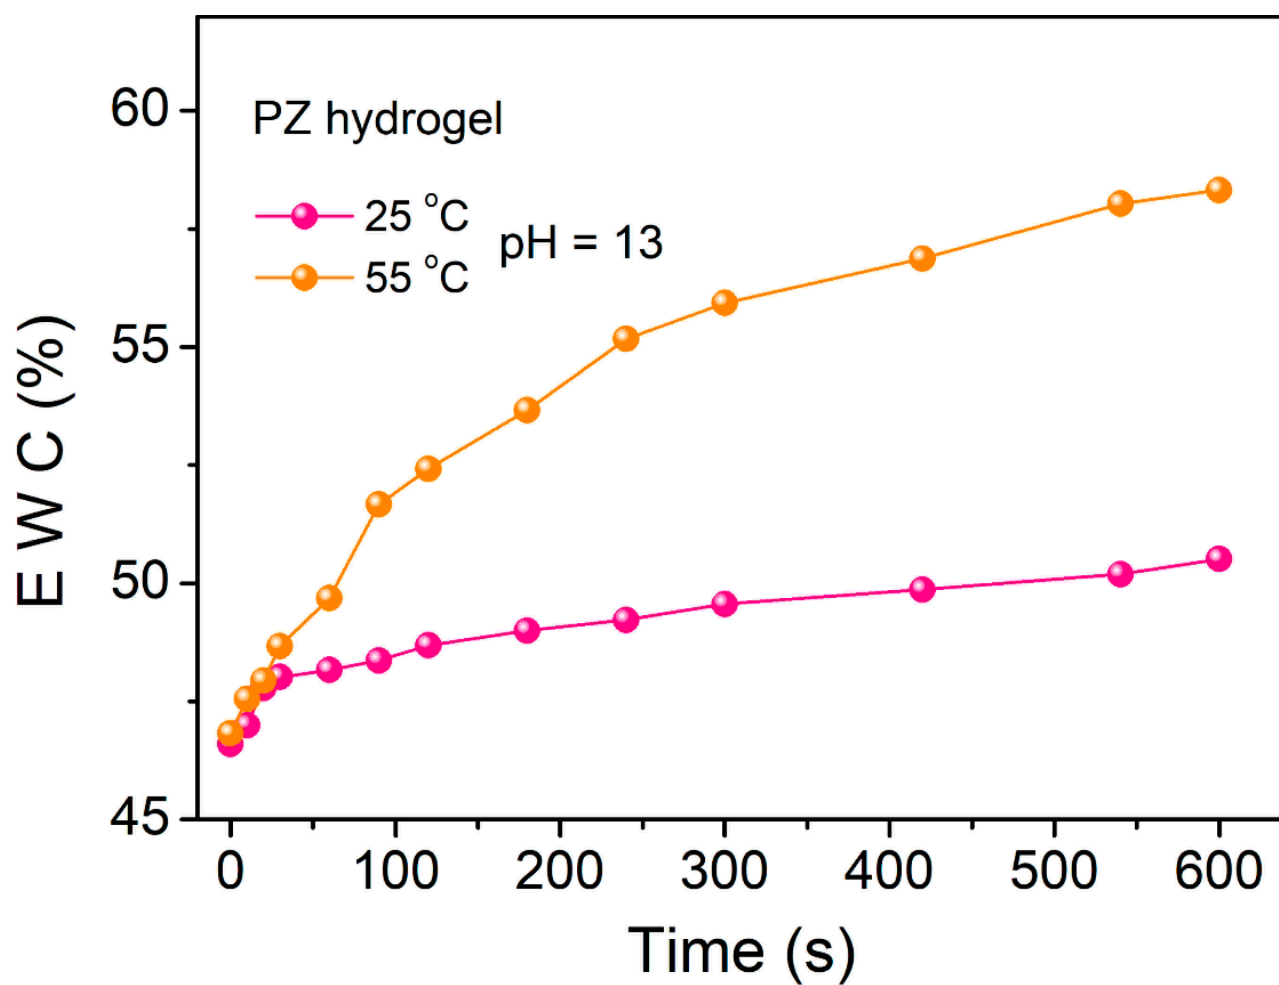

**Figure S4.** Equilibrium water contents of PZ hydrogel in response to the environmental changes from cool alkali liquors at 25 °C to hot alkali liquors at 55 °C.

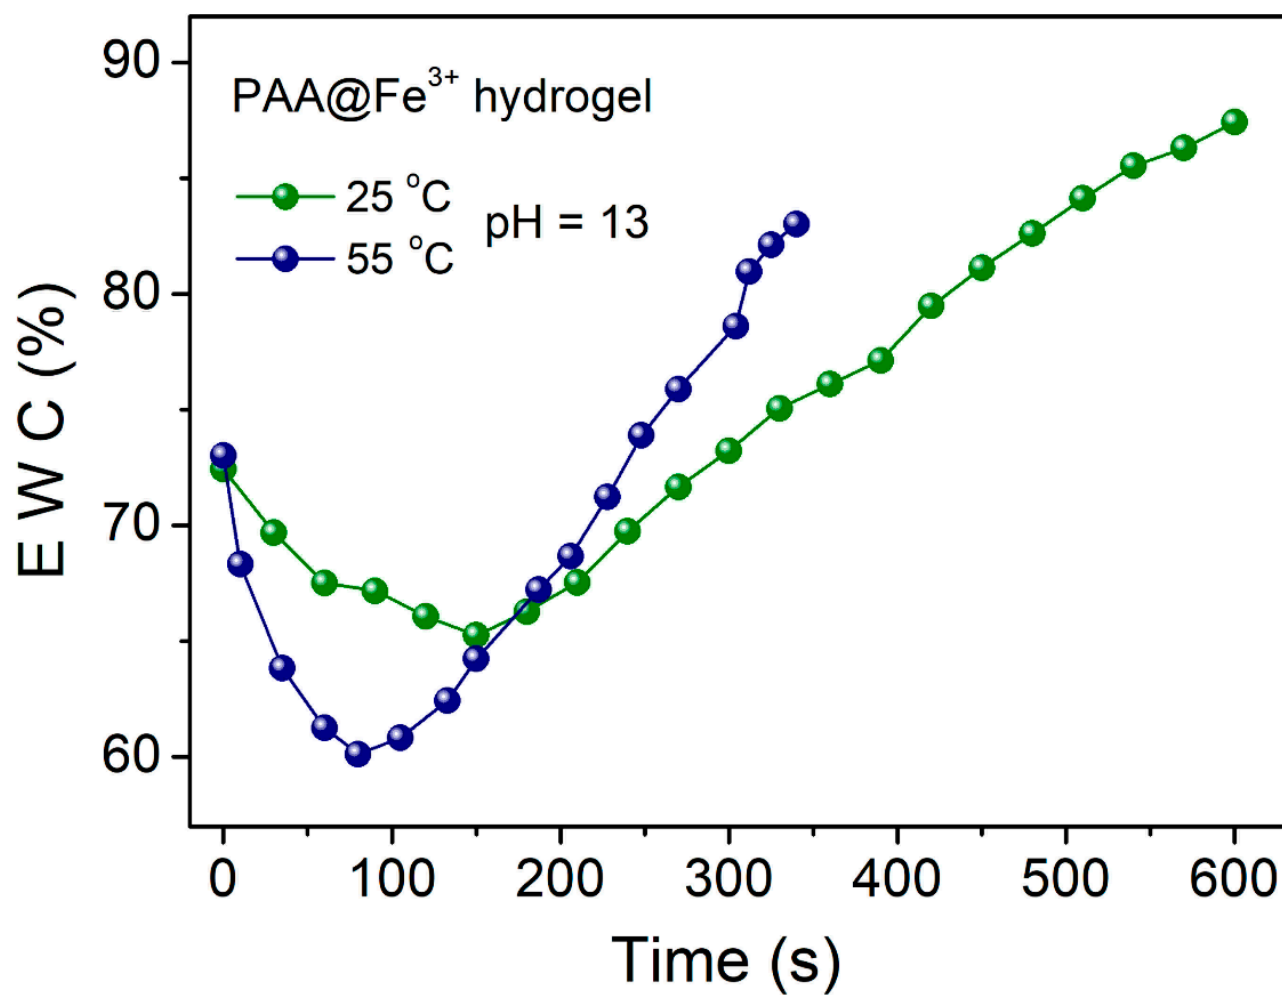

**Figure S5.** Equilibrium water contents of PAA@Fe<sup>3+</sup> hydrogel in response to the environmental changes from cool alkali liquors at 25 °C to hot alkali liquors at 55 °C.

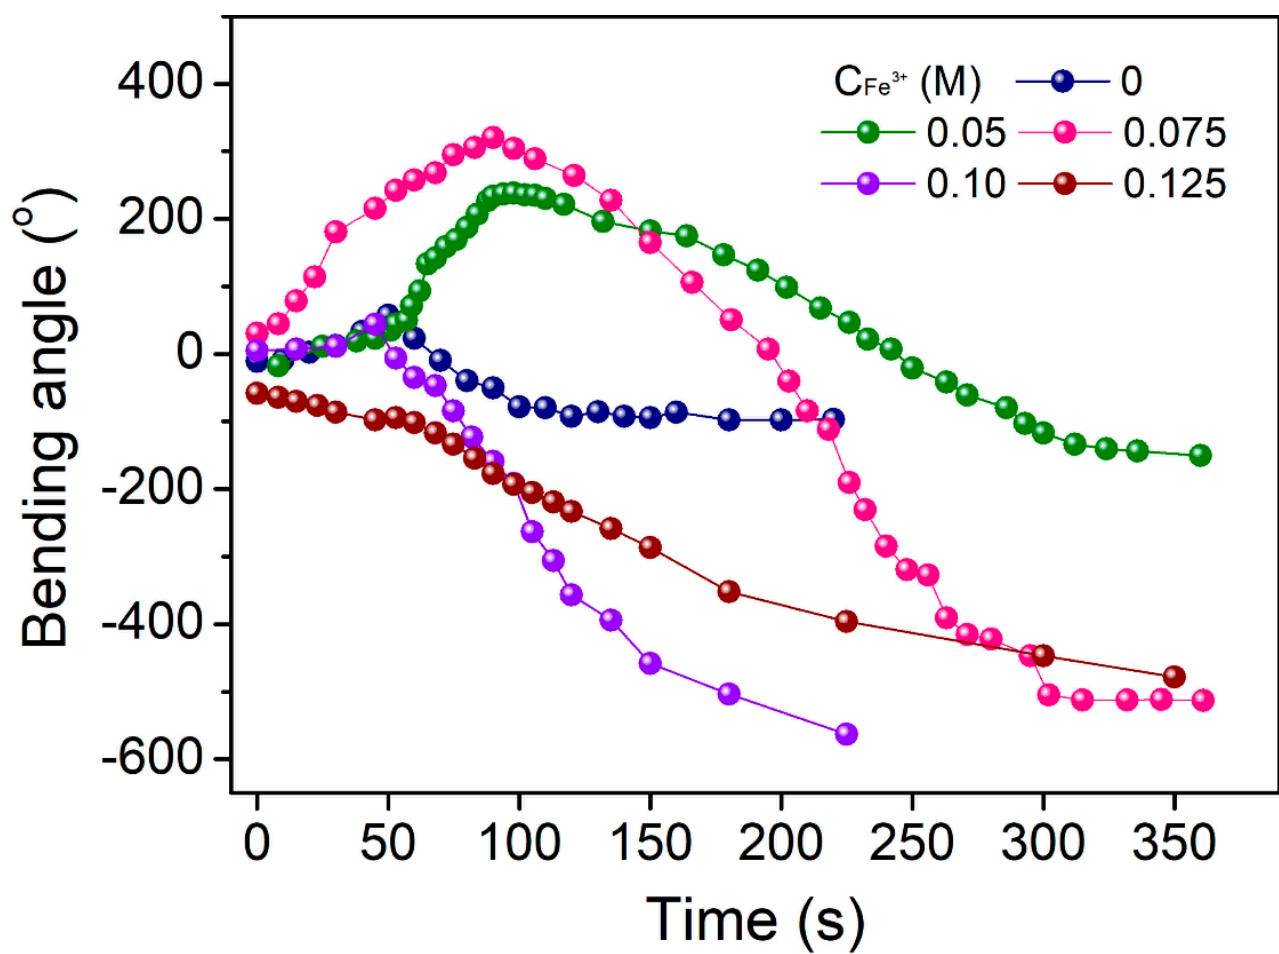

**Figure S6.** Comparison of bending behavior of the bilayer hydrogel strips coordinating with different  $\text{Fe}^{3+}$  concentrations.
